# Supplementary material for: Photodetachment of tryptophan anion: an optical probe of remote electron
Source: Royal Society of Chemistry journal article supplement (doi:10.1039/b922514p), 2010-01-01
Supplement: b922514p.pdf [file b922514p.pdf]

## SUPPLEMENTARY MATERIAL

# Photodetachment of tryptophan anion: an optical probe of remote electron

Isabelle Compagnon,<sup>a</sup> Abdul-Rahman Allouche,<sup>a</sup> Franck Bertorelle,<sup>a</sup> Rodolphe Antoine<sup>a</sup> and Philippe Dugourd<sup>\*a</sup>

### 1) Relative energies obtained with DFT and MP2 methods

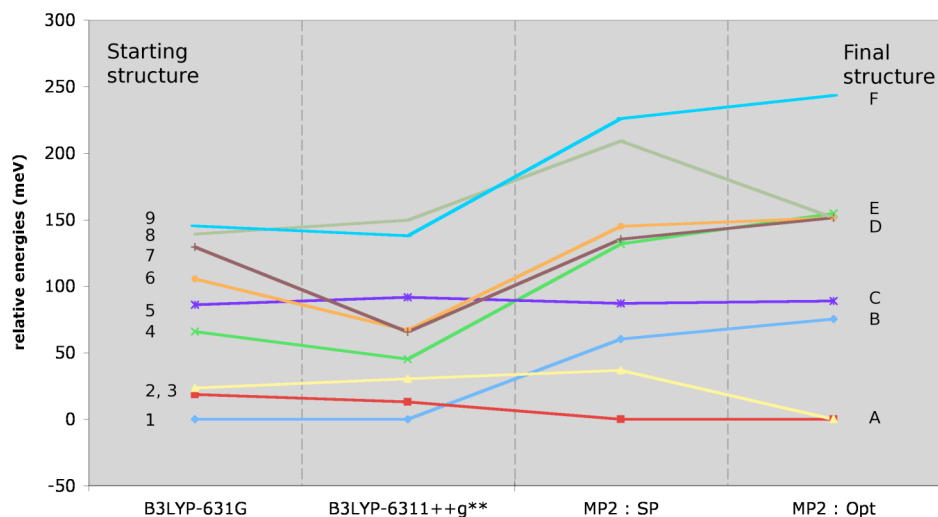

10 Fig. SI-1: Relative energies obtained at the different levels of calculation. MP2:SP corresponds to the single point energies of the B3LYP-6311++G\*\* structures calculated with MP2 method, using 6-311++G\*\* basis set.

### 2) TD-DFT spectrum of deprotonated tryptophan (Conf A)

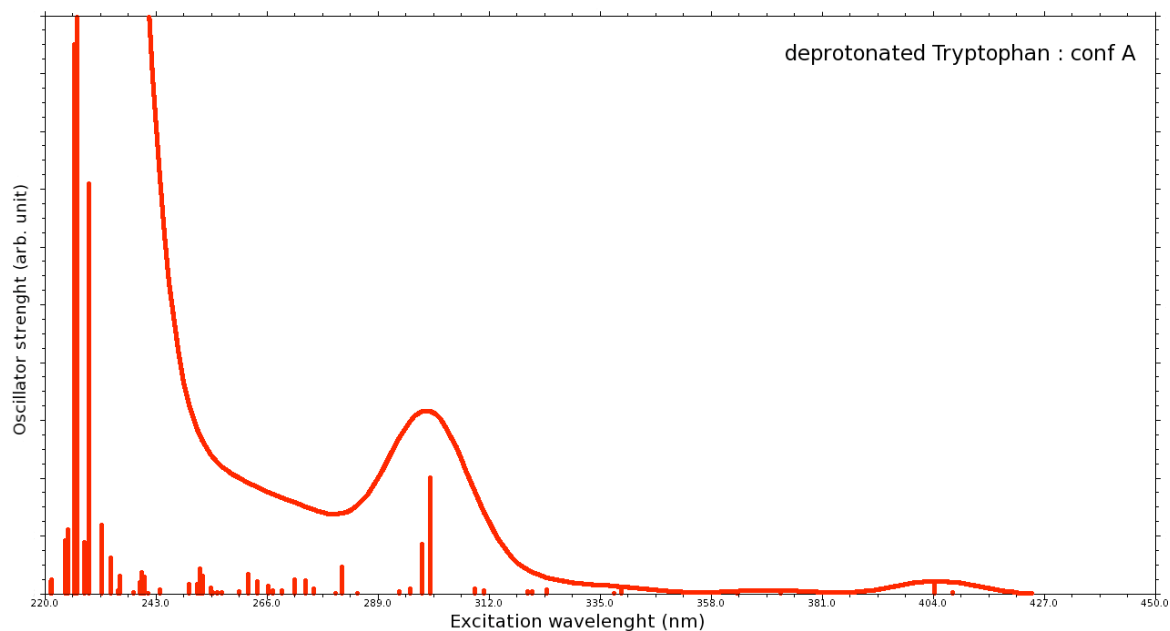

Fig. SI-2: full calculated TD-DFT spectrum of deprotonated tryptophan (conf A)
